# Supplementary material for: Natural hydrogen production from serpentinized mantle rocks
Source: Research Square preprint supplement (doi:10.21203/rs.3.rs-7365343/v1), 2025-08-21
Supplement: Supplementary file 1 [file 71a64cc53644a35c6082c1ef.docx]

**Supplementary 1: Mathematical and Physical Description of the Methodology**

**1. Temperature distribution.** The model solves the steady-state heat conduction equation in one dimension

(1.1)

where is the depth-dependent thermal conductivity, is temperature, and is depth below the surface. The computational domain is discretized into uniform grid cells with a specified vertical spacing. Boundary conditions are a fixed temperature at the surface, and a constant heat flux at the bottom of the domain. The thermal conductivity profile is defined as a piecewise linear function with depth (z), segmented into multiple depth intervals, each characterized by distinct conductivity values representing the main geological layers. Within each interval, conductivity varies linearly (interpolated) according to

(1.2)

where and ​ are the conductivity values at depths and , respectively. The resulting 1D temperature profile is then extended laterally and interpolated onto the 3D inversion mesh, yielding a spatial temperature field defined at each cell of the model.

**2. Source rock volume.** The code performs a PGI inversion 1,2 that minimizes an objective function of the form

(2.1)

where represents the data misfit between observed and predicted gravity and magnetic data, is a petrophysical penalty based on a Gaussian Mixture Model (GMM) built from density (ρ) and magnetic susceptibility (χ), is a regularization term promoting model smoothness or closeness to prior information, β controls the influence of the petrophysical term in the inversion, and α regulates the model regularization. This inversion produces a model that includes the density ρ() and magnetic susceptibility χ() values for all mesh voxels (smallest cube of space with defined properties). After inversion, for each voxel at spatial position, the recovered values of density and magnetic susceptibility are evaluated. Voxels whose properties fall within the predefined range (or cluster) associated with serpentinite are flagged using a binary mask of the form

(2.2)

Each identified serpentinite voxel is assigned a volume, corresponding to the discretization dimensions of the mesh. Summing the volumes of all voxels where yields the total volume of serpentinite. After that, the selected volumes are filtered by temperature with a mask of the form

(2.3)

The final filtered serpentinite volume corresponds to voxels where both and. Subsequently, this temperature-filtered serpentinite volume is further subdivided into discrete temperature intervals (e.g., 100-125°C, 125-150°C, etc.). For each interval, the corresponding volume of serpentinite is denoted as. Each original model voxel is internally subdivided into smaller cells*,* on which all future calculations are performed, determined by the fracture spacing parameters *( )*. Thus, one reactive volume previous to serpentinization correction is

(2.4)

**3. Serpentinization correction.** The correction factor ​accounts for the reduction in reactive volume caused by prior serpentinization. In our model, we assume that the serpentinization front progressively transforms fresh peridotite into serpentinite as it advances, fully consuming the reactive components in each transformed volume (e.g., Mével, 2003; Debret et al., 2013; Uno and Kirby, 2019), although even fully altered rock may retain a small unreacted fraction of about 2% 6,7. The relationship between serpentinization degree and petrophysical properties is derived from reference datasets (Miller and Christensen, 1997; Bonnemains et al., 2016; Chen et al., 2021; Cutts et al., 2021; Chibati et al., 2022), for unaltered peridotite (= 3.24 g/cm3, = 0.0011 SI) and for fully serpentinized rock (= 2.62 g/cm3, = 0.07 SI). For any given degree of serpentinization, the expected density and susceptibility are computed via weighted averages

(3.1)

(3.2)

where is the serpentinization degree expressed as a fraction. These expected values are compared with the mode of the inversion-derived density and susceptibility distributions (computed using kernel density estimation) to infer the average degree of serpentinization. To apply a correction due to the partial serpentinization of the reactive volume, we use the following expression

(3.3)

This equation reflects the fraction of rock volume that has been geometrically consumed by an isotropic serpentinization front, assuming uniform advance in all directions. The correction is applied to the volume of each cell giving the reactive volume as

(3.4)

where is the total serpentinite volume within each cell (from eq. 2.4) and ​ scales the result based on the degree of prior alteration.

**4. Serpentinization front velocity.** The propagation velocity of the serpentinization front,, is estimated by scaling a reference velocity based on the relative hydrogen production rates across temperature intervals (i.e., the front advances more rapidly in regions where the production of hydrogen is higher). A reference temperature-pressure bin​, typically associated with experimentally constrained conditions, is selected along with its corresponding serpentinization front velocity . For each temperature-pressure interval, the front velocity is calculated as

(4.1)

where is a reference velocity, is the hydrogen production rate, and is the hydrogen production rate under reference conditions. The multiplicative factor is a scenario-based scaling factor determined by the standard deviation of the reference velocity reflecting kinetic uncertainty, defined for minimum, average, and maximum cases, which ultimately determine the final production range.

**5. Pressure gradients.** Pressure was estimated using a depth-dependent gradient transitioning from hydrostatic to lithostatic conditions. For shallow depths (≤ 3,000 m), pressure is purely hydrostatic. Between 3,000 m and 20,000 m, we applied piecewise linear interpolations that progressively increase the pressure from slightly above hydrostatic (1.05×) to a fraction of the lithostatic gradient (up to 0.75×). For depths > 20,000 m, pressure follows a reduced lithostatic gradient

This approach ensures a smooth transition between pressure regimes and reflects compaction and fluid retention differences with depth.

**6. Deep water flow capacity.** Flow through the fractured medium is computed using Darcy’s law, where the volumetric flow rate Q is defined as:

(6.1)

where is the permeability, is the connected fracture surface area, is the pressure differential driving the flow, is the dynamic viscosity of the water, and is the characteristic flow path length. Permeability 𝑘 follows an empirical trend based on depth-dependent fracture scaling 13, expressed as distributions reflecting natural variability in subsurface properties

(6.2)

where z is the depth and 𝜀 is a random perturbation drawn from a uniform distribution within ±0.3 log-units, representing natural scatter in permeability observations. The fracture surface area 𝐴 for each sample is computed from the number of through-going fractures across the damage zone as

(6.3)

where is the number of fractures (itself dependent on fracture density and damage zone width), is the effective fractured length of the fault (a fraction of the total fault length), and is the depth. A connection fraction ∈ [0.25, 0.50] is applied to simulate not-hydraulically connected segments, yielding the effective surface area

(6.4)

Each simulation computes the expected flow 𝑄, which is then compared against the design target. The simulation outputs the proportion of configurations for which the system can sustain or exceed the target flow. Additionally, the 30th percentile of the simulated distribution is used to report the volumetric flow that would be achieved in 70% of the sampled cases, providing a probabilistic threshold for accurate system performance.

The target water flow is allocated among temperature intervals using a weighted distribution, in which is the allocated flow for temperature interval defined as:

(6.5)

where is the total target water flow, is the volume associated with interval , is the total volume across all intervals, is the depth penalty factor for interval 𝑖, penalizing shallower (cooler) intervals, and is the normalized hydrogen production factor for interval 𝑖, relative to the maximum productive interval.

**7. Hydrogen production without constrains.** For each cell in the model domain, the temporal evolution of hydrogen production is estimated by computing the rate at which the serpentinization front advances without limitations from water availability, saturation, or transport processes (i.e., production is determined solely by the volume of serpentinized rock and its intrinsic capacity to generate H₂). The rate of change of the volume of serpentinized rock is given by

(7.1)

where is effective surface area of the serpentinization front for one cell and is the front propagation velocity. Assuming isotropic geometry for the cells, the fixed reactive surface area is estimated as

(7.2)

where is the available reactive volume already reduced according to the degree of prior serpentinization. Assuming full reactivity of the reacting volume, hydrogen production for one cell at time *t* is computed as

(7.3)

where serpentinized peridotite cells contribute to hydrogen generation at the local thermodynamic yieldfor the specific scenarios (). To estimate the total hydrogen production, the individual contributions from all reactive cells within the effective serpentinized volume across all temperature intervals are summed and integrated over time

(7.4)

**8. Hydrogen production estimation with constrains.** Hydrogen generation in this model is affected by several limiting processes, including fluid saturation, water delivery, and porosity evolution. As the serpentinization front progresses, it generates additional porosity that facilitates water infiltration. This newly formed porosity, however, is progressively reduced as secondary minerals precipitate and fill the pore space. The total water input at one cell () at each time step reflects both externally supplied inflow and the internal accommodation required to fill newly generated porosity, as no voids are permitted in the solid framework under mass conservation principles

(8.1)

where is the porosity produced by the reaction, represents the advance of the reactive volume and is the water input rate from diffusion or fracture-controlled flow. Diffusive inflow across the outer shell of the cell up to the reactive nucleus is governed by Fick’s law and depends on the temperature-dependent effective diffusivity

(8.2)

where is the effective diffusivity, is the shell thickness (distance to the unreacted core), the external face area and is the density of water. Fracture-driven inflow is estimated via Darcy’s law, assuming flow through internal fractures spaced by *s* within the reactive shell. The number of fractures in the shell is

(8.3)

Each fracture spans the external face, and the total fracture surface area is approximated as

(8.4)

The fracture-driven mass inflow is then

(8.5)

where is the fracture permeability, is the temperature-dependent dynamic viscosity of water, is the pressure differential across the shell and is the shell thickness (distance to the unreacted core). The total external inflow is the sum of diffusive and fracture contributions

(8.6)

The ability of the water to retain hydrogen is limited by solubility under in-situ conditions. The maximum moles of hydrogen that the water can dissolve is

(8.7)

where represents the maximum concentration of molecular hydrogen that can be dissolved in the fluid phase under given pressure (P) conditions 14

(8.8)

To avoid saturation, the actual hydrogen production must not exceed this capacity. The saturation level of hydrogen in the infiltrating water is updated at each time step to account for the accumulation of dissolved H₂

(8.9)

whereis the hydrogen saturation from the previous step, is the mass of water available in the reactive zone at time t and is the maximum solubility of molecular hydrogen in water under in-situ pressure conditions. Once saturation approaches unity, the chemical potential for further dissolution vanishes, halting further production unless water is renewed. The actual hydrogen production for a cell is computed by scaling the unconstrained yield by the available capacity of the aqueous phase to retain additional H2

(8.10)

where is the density of the host rock, the hydrogen production potential,the volume of rock newly serpentinized per unit time, the maximum potential H₂ production rate per unit time under current conditions and the updated saturation of the water (see previous equation). To obtain the total hydrogen production under accurate (constrained) conditions, the production rate for each reactive cell must be computed individually and then aggregated over the full serpentinized volume. This is done by summing the constrained production over all contributing cells in and integrating over time

(8.11)

This expression integrates physical constraints with reaction kinetics, capturing the dynamic balance between reactive surface advance, hydrogen solubility, water renewal, and fluid saturation. As saturation increases, the effective hydrogen yield is progressively reduced, emphasizing the importance of continuous water inflow and open-system behavior for sustained production.

**List of Symbols and Parameters**

Fracture surface area [m²].

: External face area of the cell [m²].

: Total fracture surface area within the shell [m²].

: Effective surface area of the serpentinization front for one cell [m²].

: Serpentinization correction factor accounting for previously altered rock volume [-].

: Effective diffusivity, temperature-dependent [m² s⁻¹].

: Fracture spacing parameters in the x, y, and z directions [m].

: Degree of serpentinization, fraction from 0 (unaltered) to 1 (fully serpentinized).

Scenario-based scaling factor determined by kinetic uncertainty [-].

: Connection fraction accounting for hydraulically connected fractures [-].

: Weighting factor between hydrostatic and lithostatic pressure depending on depth z [-].

: Diffusive water inflow [kg s⁻¹].

: Fracture-driven water inflow [kg s⁻¹].

Total external water inflow into a cell [kg s⁻¹].

Permeability of fractured rock [m²].

: Kinetic scenario factor (minimum, average, maximum) [-].

Flow path length, approximated by depth [m].

: Effective fractured length of the fault [m].

: Total water mass input to a cell at time t [kg].

Number of fractures [-].

: Number of fractures within the reactive shell [-].

Hydrogen produced by a cell at conditions T, k_v [mol].

Maximum hydrogen that can be dissolved in available water at pressure P [mol].

: Total hydrogen production integrated over all cells and time considering physical constraints [mol].

Pressure at depth z [MPa].

: Hydrostatic pressure gradient [MPa].

: Lithostatic pressure gradient [MPa].

Volumetric flow rate of water through fractures [m³ s⁻¹].

: Hydrogen production rate derived from thermodynamic equilibrium simulations [mol H₂ kg⁻¹ rock].

: Spacing between internal fractures [m].

: Hydrogen saturation in water at time t, fraction from 0 (unsaturated) to 1 (fully saturated).

: Maximum solubility of hydrogen under pressure P [mol H₂ kg⁻¹ water].

: Temperature [°C].

: Reference temperature for serpentinization velocity [°C].

: Reactive volume of a cell after serpentinization correction [m³].

: Initial reactive volume per subdivided cell based on fracture spacing [m³].

: Serpentinization front velocity dependent on temperature and kinetic scenario [m day⁻¹].

: Volume of serpentinite within a specific temperature range [m³].

: Volume of a single voxel in the discretized mesh [m³].

: Spatial coordinates in three-dimensional space [m].

: Depth below the surface [m].

: Thickness of the reactive shell (distance to unreacted core) [m].

*:* Depth-dependent thermal conductivity.

Dynamic viscosity of water [Pa·s].

: Density [kg/m³].

: Density of the host rock [kg m⁻³].

: Magnetic susceptibility [SI].

: Reaction-generated porosity [-].

**References**

1. Astic, T. & Oldenburg, D. W. A framework for petrophysically and geologically guided geophysical inversion using a dynamic Gaussian mixture model prior. *Geophysical Journal International* **219**, 1989–2012 (2019).

2. Astic, T., Heagy, L. J. & Oldenburg, D. W. Petrophysically and geologically guided multi-physics inversion using a dynamic Gaussian mixture model. *Geophysical Journal International* **224**, 40–68 (2020).

3. Mével, C. Serpentinization of abyssal peridotites at mid-ocean ridges. *Comptes Rendus. Géoscience* **335**, 825–852 (2003).

4. Debret, B., Nicollet, C., Andreani, M., Schwartz, S. & Godard, M. Three steps of serpentinization in an eclogitized oceanic serpentinization front (Lanzo Massif – Western Alps). *Journal Metamorphic Geology* **31**, 165–186 (2013).

5. Uno, M. & Kirby, S. Evidence for multiple stages of serpentinization from the mantle through the crust in the Redwood City Serpentinite mélange along the San Andreas Fault in California. *Lithos* **336–337**, 276–292 (2019).

6. Huang, R., Sun, W., Song, M. & Ding, X. Influence of pH on Molecular Hydrogen (H2) Generation and Reaction Rates during Serpentinization of Peridotite and Olivine. *Minerals* **9**, 661 (2019).

7. Huang, R., Sun, W., Ding, X., Zhao, Y. & Song, M. Effect of pressure on the kinetics of peridotite serpentinization. *Phys Chem Minerals* **47**, 33 (2020).

8. Miller, D. J. & Christensen, N. I. *Seismic Velocities of Lower Crustal and Upper Mantle Rocks from the Slow-Spreading Mid-Atlantic Ridge, South of the Kane Transform Zone (MARK). Proceedings of the Ocean Drilling Program, 153 Scientific Results*. vol. 153 (Ocean Drilling Program, 1997).

9. Bonnemains, D. *et al.* Magnetic signatures of serpentinization at ophiolite complexes. *Geochem Geophys Geosyst* **17**, 2969–2986 (2016).

10. Chen, H. *et al.* Induced Polarization and Magnetic Responses of Serpentinized Ultramafic Rocks From Mid‐Ocean Ridges. *JGR Solid Earth* **126**, e2021JB022915 (2021).

11. Cutts, J. A. *et al.* Deducing Mineralogy of Serpentinized and Carbonated Ultramafic Rocks Using Physical Properties With Implications for Carbon Sequestration and Subduction Zone Dynamics. *Geochem Geophys Geosyst* **22**, e2021GC009989 (2021).

12. Chibati, N., Géraud, Y. & Essa, K. S. Petrophysical characterization and thermal conductivity prediction of serpentinized peridotites. *Geophysical Journal International* **231**, 1786–1805 (2022).

13. Manning, C. E. & Ingebritsen, S. E. Permeability of the continental crust: Implications of geothermal data and metamorphic systems. *Reviews of Geophysics* **37**, 127–150 (1999).

14. Li, D., Beyer, C. & Bauer, S. A unified phase equilibrium model for hydrogen solubility and solution density. *International Journal of Hydrogen Energy* **43**, 512–529 (2018).

**Supplementary 2: Parameters used in the calculations**

**Main parameters.** The methods used in this study integrate thermodynamic modelling, petrophysical constraints, and three-dimensional geophysical inversions. The main parameters are detailed in Tables 1 and 2 and in the corresponding subsections of the Methods section.

**Supplementary Table 1:** Parameters used in the calculations in the Western Pyrenees

| **Parameter** | **Value/Range** | **Reference/Comments** |
| --- | --- | --- |
| **Initial Model** | | |
| Seismic Velocity Model | Vp​ ≈ 5.0 to 8.0+ km/s | 1 |
| Geological Units | 3 Units: Serpentinites, Mantle and Crust | 2–4 |
| **Temperature Calculations** | | |
| Surface Temperature | 10 °C | 5 |
| Background Heat Flow | 0.075 W/m² | 6 |
| Thermal Conductivity and Depth Intervals | 1.1–4.0 W/mK across multiple depth intervals | 7,8 |
| Number of Simulations | 50 | - |
| Temperature Mesh Size (1D) | 10 m | - |
| **Mesh data** | | |
| Mesh Expansion | 10% (rectangular) | To avoid edge effects |
| Mesh Cell Dimensions | 750 m × 750 m × 500 m | Maximum voxel size |
| Model Depth | Up to 20000 m | Maximum depth |
| **Petrophysical data and inversion constrains** | | |
| Crust | Dens: 2.60 ± 0.07 g/cm³; Mag Sus: 0.001 ± 0.003 SI | 2–4 |
| Serpentinite | Dens: 2.85 ± 0.04 g/cm³; Mag Sus:0.030 ± 0.005 SI | 2–4 |
| Mantle | Dens: 3.05 ± 0.04 g/cm³; Mag Sus:0.0001 ± 0.003 SI | 2–4 |
| Inversion Parameter Bounds | Dens: 2.2–3.5 g/cm³; Mag Sus: 0–0.1 SI | Limits consistent with the petrophysical properties of the units present in the area |
| **Source rocks** | | |
| Fracture Spacing | 1.00 m in x, y, and z | 9–11 |
| Porosity at reaction front | 8% | 12 |
| Fracture spacing in serpentinites | 0.05 m | Present study |
| Permeability of internal fractures | 1e-20 m2 | 13 |
| Rock Type | Lherzolite | 14 |
| Water-to-rock ratio | 0.16 | Present study |
| **External water flow simulation** | | |
| Design Flow Target | 5x105 L/day | Present study |
| Fault Length | 50 km | Present study |
| Damage Zone Thickness | 100 – 1500 m | Present study |
| Fractured Length Fraction | 10% – 70% | Present study |
| Depth Range | 1000 – 12000 m | Present study |
| Fracture Density | ~1/100 to 1/5 fractures per meter, depth-dependent | Present study |
| Pore Pressure Excess (ΔP) | 60 – 100 MPa | Present study |
| Dynamic Viscosity (μ) | 1e-3 – 1e-5 Pa·s (temperature-dependent) | Present study |
| Connected Fraction of Fractures | 25% – 50% | Present study |
| Permeability | log₁₀ k = –3.2·log₁₀(z/1000) – 14 ± 0.3 | 15 |
| **Other parameters** | | |
| Reference front velocity | 1.27 x 10-5 cm/day | 16 |
| Reference temperature | 300-325°C | 16 |
| Standard deviation | 7.68 x 10-6 cm/day | 16 |

**Supplementary Table 2:** Parameters used in the calculations in Northern California

| **Parameter** | **Value/Range** | **Reference/Comments** |
| --- | --- | --- |
| **Initial Model** | | |
| Seismic Velocity Model | Vp​ ≈ 4.6 to 7.4+ km/s | 17 |
| Geological Units | 3 Units: Crust, Serpentinites and Sediments | 18–20 |
| **Temperature Calculations** | | |
| Surface Temperature | 15 °C | 21 |
| Background Heat Flow | 0.095 W/m² | 6 |
| Thermal Conductivity and Depth Intervals | 1.1–4.0 W/mK across multiple depth intervals | 7,8 |
| Number of Simulations | 50 | Present study |
| Temperature Mesh Size (1D) | 100 m | Present study |
| **Mesh data** | | |
| Mesh Expansion | 10% (Square) | To avoid edge effects |
| Mesh Cell Dimensions | 1000 m × 1000 m × 500 m | Maximum voxel size |
| Model Depth | Up to 20000 m | Maximum depth |
| **Petrophysical data and inversion constrains** | | |
| Crust | Dens: 2.80 ± 0.05 g/cm³; Mag Sus: 0.001 ± 0.005 SI | 18,20 |
| Serpentinite | Dens: 2.63 ± 0.07 g/cm³; Mag Sus:0.07 ± 0.007 SI | 18,20 |
| Sediments | Dens: 2.40 ± 0.05 g/cm³; Mag Sus:0.001 ± 0.005 SI | 18,20 |
| Inversion Parameter Bounds | Dens: 1.7–3.5 g/cm³;: 0– Mag Sus: 0.15 SI | Limits consistent with the petrophysical properties of the units present in the area |
| **Source rocks** | | |
| Fracture Spacing | 1.00 m in x, y, and z | 9–11 |
| Porosity at reaction front | 8% | 12 |
| Fracture spacing in serpentinites | 0.05 m | Present study |
| Permeability of internal fractures | 1e-20 m2 | 13 |
| Rock Type | Harzburgite | 22 |
| Water-to-rock ratio | 0.20 | Present study |
| **External water flow simulation** | | |
| Design Flow Target | 2x106 L/day | Present study |
| Fault Length | 250 km | Present study |
| Damage Zone Thickness | 100 – 1500 m | Present study |
| Fractured Length Fraction | 10% – 70% | Present study |
| Depth Range | 1000 – 12000 m | Present study |
| Fracture Density | ~1/100 to 1/5 fractures per meter, depth-dependent | Present study |
| Pore Pressure Excess (ΔP) | 60 – 100 MPa | Present study |
| Dynamic Viscosity (μ) | 1e-3 – 1e-5 Pa·s  (temperature-dependent) | Present study |
| Connected Fraction of Fractures | 25% – 50% | Present study |
| Permeability | log₁₀ k = –3.2·log₁₀(z/1000) – 14 ± 0.3 | 15 |
| **Other parameters** | | |
| Reference front velocity | 1.27 x 10-5 cm/day | 16 |
| Reference temperature | 300-325°C | 16 |
| Standard deviation | 7.68 x 10-6 cm/day | 16 |

**References**

1. Lescoutre, R. *et al.* The fingerprint of structural inheritances in the W-Pyrenees revealed by machine learning detection of seismicity. *Tectonophysics* **903**, 230685 (2025).

2. Chibati, N., Géraud, Y. & Essa, K. S. Petrophysical characterization and thermal conductivity prediction of serpentinized peridotites. *Geophysical Journal International* **231**, 1786–1805 (2022).

3. Lehujeur, M. *et al.* Three-dimensional shear velocity structure of the Mauléon and Arzacq Basins (Western Pyrenees). *BSGF - Earth Sci. Bull.* **192**, 47 (2021).

4. Saspiturry, N., Allanic, C. & Peyrefitte, A. Serpentinization and Magmatic Distribution in a Hyperextended Rift Suture: Implication for Natural Hydrogen Exploration (Mauléon Basin, Pyrenees). *Tectonics* **43**, e2024TC008385 (2024).

5. Cuadrat, J. M. *et al.* Climate of the Pyrenees: Extremes indices and long-term trends. *Science of The Total Environment* **933**, 173052 (2024).

6. Global Heat Flow Data Assessment Group *et al.* The Global Heat Flow Database: Release 2024. (2024) doi:10.5880/FIDGEO.2024.014.

7. Gemant, A. The Thermal Conductivity of Soils. *Journal of Applied Physics* **21**, 750–752 (1950).

8. Clauser, C. & Huenges, E. Thermal Conductivity of Rocks and Minerals. *Rock physics and phase relations: a handbook of physical constants* **3**, 105–126 (1995).

9. O’Hanley, D. S. Solution to the volume problem in serpentinization. *Geol* **20**, 705 (1992).

10. Plümper, O. & Matter, J. Olivine—The Alteration Rock Star. *Elements* **19**, 165–172 (2023).

11. Uno, M. & Kirby, S. Evidence for multiple stages of serpentinization from the mantle through the crust in the Redwood City Serpentinite mélange along the San Andreas Fault in California. *Lithos* **336–337**, 276–292 (2019).

12. Chogani, A. & Plümper, O. Decoding the nanoscale porosity in serpentinites from multidimensional electron microscopy and discrete element modelling. *Contrib Mineral Petrol* **178**, 78 (2023).

13. Farough, A., Moore, D. E., Lockner, D. A. & Lowell, R. P. Evolution of fracture permeability of ultramafic rocks undergoing serpentinization at hydrothermal conditions: An experimental study. *Geochem Geophys Geosyst* **17**, 44–55 (2016).

14. Tichadou, C. *et al.* Mineralogical and geochemical study of serpentinized peridotites from the North-Western Pyrenees: New insights on serpentinization along magma-poor continental passive margins. *Lithos* **406–407**, 106521 (2021).

15. Manning, C. E. & Ingebritsen, S. E. Permeability of the continental crust: Implications of geothermal data and metamorphic systems. *Reviews of Geophysics* **37**, 127–150 (1999).

16. Malvoisin, B. & Brunet, F. Water diffusion-transport in a synthetic dunite: Consequences for oceanic peridotite serpentinization. *Earth and Planetary Science Letters* **403**, 263–272 (2014).

17. Furlong, K. P., Villaseñor, A., Benz, H. M. & McKenzie, K. A. Formation and Evolution of the Pacific‐North American (San Andreas) Plate Boundary: Constraints From the Crustal Architecture of Northern California. *Tectonics* **43**, e2023TC007963 (2024).

18. Godfrey, N. J., Beaudoin, B. C. & Klemperer, S. L. Ophiolitic basement to the Great Valley forearc basin, California, from seismic and gravity data: Implications for crustal growth at the North American continental margin. *Geological Society of America Bulletin* **109**, 1536–1562 (1997).

19. Langenheim, V. E., Jachens, R. C., Wentworth, C. M. & McLaughlin, R. J. Previously unrecognized regional structure of the Coastal Belt of the Franciscan Complex, northern California, revealed by magnetic data. *Geosphere* **9**, 1514–1529 (2013).

20. Langenheim, V. E., McLaughlin, R. J. & Melosh, B. L. Integrated geologic and geophysical modeling across the Bartlett Springs fault zone, northern California (USA): Implications for fault creep and regional structure. *Geosphere* **20**, 129–151 (2024).

21. National Centers for Environmental Information. Climate at a Glance: California average annual temperature. (2023).

22. Shervais, J. W. *et al.* Multi-Stage Origin of the Coast Range Ophiolite, California: Implications for the Life Cycle of Supra-Subduction Zone Ophiolites. *International Geology Review* **46**, 289–315 (2004).
